# Supplementary material for: Mechanically and Thermally Induced Degradation and Modification of Cereal Biopolymers during Grinding
Source: MDPI journal article supplement (doi:10.3390/polym11030448), 2019-03-08
Supplement: s1 [file s1]

# Mechanically and Thermally Induced Degradation and Modification of Cereal Biopolymers during Grinding

Sabina Paulik, Mario Jekle\* and Thomas Becker

Technical University of Munich, Institute of Brewing and Beverage Technology, Research Group Cereal Technology and Process Engineering, 85354 Freising, Germany; sabina.jakobi@tum.de (S.P.); mjekle@tum.de (M.J.); tb@tum.de (T.B.)

\* Correspondence: mjekle@tum.de (M.J.); Tel.: +49-8161-71-3669

**Table S1.** Mean ( $\pm$  SD) gelatinization enthalpy  $\Delta H$  of thermally treated wheat flour and wheat starch. SD = standard deviation;  $n = 3$ .

| Thermal treatment (°C) | $\Delta H$ flour (J/g dm) | $\Delta H$ starch (J/g dm) |
|------------------------|---------------------------|----------------------------|
| +20                    | $5.63 \pm 0.66^{A,B}$     | $3.02 \pm 0.01^A$          |
| +40                    | $6.22 \pm 0.31^A$         | $2.95 \pm 0.12^A$          |
| +65                    | $5.60 \pm 0.41^{A,B}$     | $2.91 \pm 0.09^A$          |
| +80                    | $5.30 \pm 0.37^{A,B}$     | $2.97 \pm 0.49^A$          |
| +95                    | $4.28 \pm 0.17^B$         | $2.69 \pm 0.03^A$          |
| +110                   | $5.68 \pm 0.39^A$         | $2.83 \pm 0.11^A$          |
